# Supplementary material for: Effect of sequential high-flow nasal cannula oxygen therapy and non-invasive positive-pressure ventilation in patients with difficult weaning from mechanical ventilation after extubation on respiratory mechanics
Source: PubMed Central journal article supplement — Ann Transl Med. 2021 Aug;9(15):1251. doi: 10.21037/atm-21-3408 (PMC8421953; doi:10.21037/atm-21-3408), 2021-08
Supplement: atm-09-15-1251-dss.pdf [file atm-09-15-1251-dss.pdf]

## Data Sharing Statement

|                     |                                                                                                                                                     |                                                                                                                                                                                                 |
|---------------------|-----------------------------------------------------------------------------------------------------------------------------------------------------|-------------------------------------------------------------------------------------------------------------------------------------------------------------------------------------------------|
| <b>Article Info</b> | <a href="https://dx.doi.org/10.21037/atm-21-3408">https://dx.doi.org/10.21037/atm-21-3408</a>                                                       |                                                                                                                                                                                                 |
| <b>Item</b>         | <b>Question</b>                                                                                                                                     | <b>Authors' Response<br/>(place "-" if not applicable)</b>                                                                                                                                      |
| 1                   | Would you like to share data collected for your study to others?                                                                                    | Yes.                                                                                                                                                                                            |
| 2                   | If not, would you like to share the reason for your decision?                                                                                       | -                                                                                                                                                                                               |
| 3                   | What data in particular will be shared?                                                                                                             | Raw data on patient related indicators, general information about the patient.                                                                                                                  |
| 4                   | Any other documents will be shared? Such as study protocol, statistical analysis plan, informed consent form, clinical study report, analytic code. | Statistical analysis plan and informed consent form will also be shared if requested.                                                                                                           |
| 5                   | When will data availability begin?                                                                                                                  | From the publication date.                                                                                                                                                                      |
| 6                   | When will data availability end?                                                                                                                    | Two years within the publication date, since the technique or survival date may be updated over time.                                                                                           |
| 7                   | To whom will you share the data?                                                                                                                    | Respiratory and critical medicine physicians and experts interested in respiratory mechanics.                                                                                                   |
| 8                   | For what type of analysis or purpose?                                                                                                               | To analyze and evaluate the effects of high-flow nasal cannula and non-invasive positive-pressure ventilation on the respiratory mechanics of patients with difficult weaning after extubation. |
| 9                   | How or where can the data/documents be obtained?                                                                                                    | By email to corresponding author:<br>xuyuanda@sina.com                                                                                                                                          |
| 10                  | Any other restrictions?                                                                                                                             | We may balance the potential benefits and risks for each request and then provide the data that could be shared.                                                                                |
